# Supplementary material
Source: Springer Nature journal article supplement (https://www.springermedizin.de/resource/supplementary/12943_2012_1133_MOESM3_ESM.pdf/9552566)

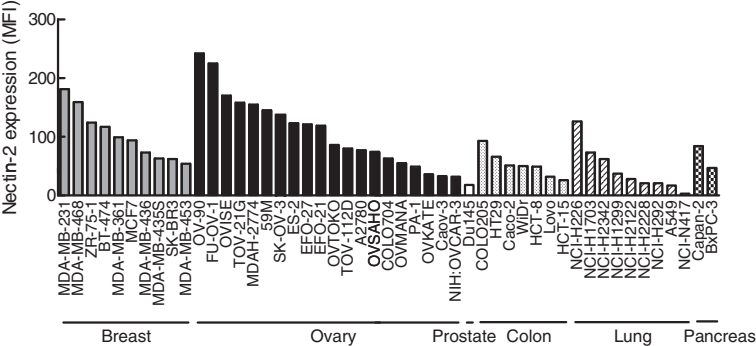

Supplement: MOESM3 [file 9552566]
